# Supplementary material for: A New Water-Soluble Bactericidal Agent for the Treatment of Infections Caused by Gram-Positive and Gram-Negative Bacterial Strains
Source: PubMed Central journal article supplement (PMC7558503; doi:10.3390/antibiotics9090586), 2020-09-08
Supplement: antibiotics-09-00586-s001.pdf [file antibiotics-09-00586-s001.pdf]

Supplementary information for

# A New Water-Soluble Bactericidal Agent for the Treatment of Infections Caused by Gram-Positive and Gram-Negative Bacterial Strains

Alessandro Presentato <sup>1</sup>, Elena Piacenza <sup>1,2</sup>, Antonino Scurria <sup>3</sup>, Lorenzo Albanese <sup>4</sup>, Federica Zabini <sup>4</sup>, Francesco Meneguzzo <sup>4</sup>, Domenico Nuzzo <sup>5</sup>, Mario Pagliaro <sup>3,\*</sup>, Delia Chillura Martino <sup>1,2</sup>, Rosa Alduina <sup>1,\*</sup> and Rosaria Ciriminna <sup>3</sup>

<sup>1</sup> Department of Biological, Chemical, and Pharmaceutical Science and Technology (STEBICEF), University of Palermo, Viale delle Scienze, 90128 Palermo, Italy; alessandro.presentato@unipa.it (A.P.); elena.piacenza91@gmail.com (E.P.); delia.chilluramartino@unipa.it (D.C.M.)

<sup>2</sup> National Interuniversity Consortium of Materials Science and Technology (INSTM), Via G. Giusti 9, 50121 Firenze, Italy; elena.piacenza91@gmail.com (E.P.); delia.chilluramartino@unipa.it (D.C.M.)

<sup>3</sup> Istituto per lo Studio dei Materiali Nanostrutturati, CNR, via U. La Malfa 153, 90146 Palermo, Italy; antonino.scurria@ismn.cnr.it (A.S.); rosaria.ciriminna@cnr.it (R.C.)

<sup>4</sup> Istituto per la Bioeconomia, CNR, via Madonna del Piano 10, 50019 Sesto Fiorentino, FI, Italy; lorenzo.albanese@cnr.it (L.A.); federica.zabini@cnr.it (F.Z.); francesco.meneguzzo@cnr.it (F.M.)

<sup>5</sup> Istituto per la Ricerca e l'Innovazione Biomedica, CNR, via U. La Malfa 153, 90146 Palermo, Italy; domenico.nuzzo@cnr.it

\* Correspondence: mario.pagliaro@cnr.it (M.P.); valeria.alduina@unipa.it (R.A.)

Received: 4 August 2020; Accepted: 7 September 2020; Published: date

**Table S1.** ATR-FTIR absorption bands of grapefruit and lemon pectin and their attribution (observed maxima).

| $\tilde{\nu}$ (cm <sup>-1</sup> ) |                     |                          | Vibrational mode                                                                                                                                                                                | Identification                                                                                                                                               |
|-----------------------------------|---------------------|--------------------------|-------------------------------------------------------------------------------------------------------------------------------------------------------------------------------------------------|--------------------------------------------------------------------------------------------------------------------------------------------------------------|
| Commercial citrus pectin          | Lemon IntegroPectin | Grapefruit IntegroPectin |                                                                                                                                                                                                 |                                                                                                                                                              |
| 3347                              |                     |                          | v (OH)                                                                                                                                                                                          | Polysaccharides [1,2]; water [1,2]                                                                                                                           |
|                                   | 3295                | 3293                     | v (OH)                                                                                                                                                                                          | Polysaccharides [1,2]; water [1,2]; polyphenols [3]                                                                                                          |
| 2924                              | 2925                | 2931                     | $\nu_{as}$ (CH <sub>2</sub> ); $\nu_{as}$ (CH <sub>3</sub> ); v (CH)                                                                                                                            | Pectin backbone [1]; arabinose and galactose [1]                                                                                                             |
|                                   | 2865                | 2873                     | $\nu_s$ (CH <sub>3</sub> ); v (CH)                                                                                                                                                              | Pectin backbone [1]; pyranose rings [1]                                                                                                                      |
| 2675(s)                           | 2671(s)             |                          | v (OH)                                                                                                                                                                                          | Free carboxylic acids [1,2]                                                                                                                                  |
|                                   |                     | 2658(s)                  | v (OH)                                                                                                                                                                                          | Free carboxylic acids [1,2]                                                                                                                                  |
|                                   | 2502(s)             | 2499(s)                  | v (CO)O-H, satellite                                                                                                                                                                            | Carboxylic acid dimers [1,2]                                                                                                                                 |
| 1737                              |                     |                          | v (C=O) <sub>ester</sub>                                                                                                                                                                        | Methyl esterified carboxylic groups of galacturonic acid [1,2,4-7]                                                                                           |
|                                   | 1713                | 1715                     | $\nu_s$ (C=O)                                                                                                                                                                                   | Carboxylate and nonconjugated keto groups of carotenoids [1,2,11,12], phenols and flavonoids [3,8-9]                                                         |
|                                   | 1674(s)             |                          | v (C=O) <sub>acid</sub>                                                                                                                                                                         | Nonesterified hydrogenated acidic carbonyl and conjugated keto groups [1]; formyl groups of carotenoids [8]; carboxylic acid groups with strong H bonds [10] |
|                                   |                     | 1631(s)                  | $\delta$ (H <sub>2</sub> O); v (C=C); v (C-C); v (C=C)                                                                                                                                          | Phenyl and uracyl groups [7]; water [1]; phenolic acids [3-9]                                                                                                |
| 1607                              |                     |                          | $\nu_{as}$ (COO <sup>-</sup> ); v (C-C)                                                                                                                                                         | Carboxylate groups of polygalacturonic acid [1,7,11,12]                                                                                                      |
|                                   | 1594                | 1596                     | v (C=O)                                                                                                                                                                                         | Aromatic skeleton and keto groups [3,9,13-15]                                                                                                                |
|                                   |                     | 1578(s)                  | v (C=C); v (C=O)                                                                                                                                                                                | Aromatic skeleton and keto groups [3,9,13-15]                                                                                                                |
|                                   | 1512                | 1518                     | $\delta_{ip}$ (CH); v (C=C)                                                                                                                                                                     | Phenyl rings [3,9,15]; carotenoid compounds [8]                                                                                                              |
| 1459(s)                           |                     |                          | $\delta_{as}$ (CH <sub>3</sub> ); $\delta$ (CH <sub>2</sub> ); v (C=C); $\nu_{as}$ (COO <sup>-</sup> )                                                                                          | Pectin backbone [12-16]; aromatic compounds [9,17-19]                                                                                                        |
| 1441                              | 1436(s)             | 1438(s)                  | $\delta_{as}$ (CH <sub>3</sub> ); $\rho$ (CH <sub>2</sub> ) 1 <sup>st</sup> overtone; v (C-C)                                                                                                   | Aromatic compounds [3,9,16-18]; ester methyl groups in galacturonic and rhamnose rings of pectin [1,2,11,12,19]                                              |
| 1402                              | 1397                | 1399                     | $\delta$ (COH)COOH; $\nu_s$ (COO <sup>-</sup> ); $\delta_{ip}$ (CH); $\delta_s$ (CH <sub>3</sub> )                                                                                              | Methyl groups [3,4]; ring vibration [3,9,12]; carboxylate pectin ester groups [2-4]                                                                          |
| 1361                              | 1367                | 1367                     | $\delta_s$ (CH <sub>2</sub> ); $\delta_s$ (CH <sub>3</sub> ); $\beta_s$ (CH <sub>3</sub> ); $\delta$ (OH); $\delta_{ip}$ (COH); $\delta_{op}$ (CH <sub>3</sub> ); $\delta_s$ (CH <sub>3</sub> ) | Ester methyl groups in galacturonic and rhamnose rings of pectin [1,2,12,16]; flavonoids [9,17-19]                                                           |

| $\tilde{\nu}$ (cm <sup>-1</sup> ) |         |         | Vibrational mode                                                                                                                   | Identification                                                                                                                                 |
|-----------------------------------|---------|---------|------------------------------------------------------------------------------------------------------------------------------------|------------------------------------------------------------------------------------------------------------------------------------------------|
| 1328                              | 1327    | 1331    | $\delta$ (CH); $\nu_s$ (COO-);<br>$\omega$ (CH <sub>2</sub> );<br>$\delta_{ip}$ (C-O-H)                                            | Pyranose in pectic ring [2,9,20];<br>methoxyphenolic substitutions<br>[12]; alcohol hydroxyl groups in<br>pyranose ring [1]                    |
|                                   |         | 1296    | $\rho_s$ (CH); $\nu$ (CO-O);<br>$\nu_{ip}$ (OH)                                                                                    | Aromatic ethers [9,12,17-19]                                                                                                                   |
| 1264                              | 1261(s) |         | $\beta$ (OH); $\nu$ (C-O-C)                                                                                                        | Esters; hydroxyl groups of<br>polysaccharides [1,3,12,16,19,20]                                                                                |
|                                   |         | 1250(s) | $\nu$ (C-O)                                                                                                                        | Polyols (hydroxyflavonoids) [16-<br>19]                                                                                                        |
| 1222                              | 1222    | 1225    | $\nu$ (C(CH <sub>3</sub> ) <sub>2</sub> );<br>$\nu$ (CO-O);<br>$\nu_{ip}$ (OH);<br>$\delta_{ip}$ (C-O-H)                           | Aromatic ethers [3,8,9,17-20];<br>methoxyphenolic substitutions [8];<br>alcohol hydroxyl groups in<br>pyranose ring [1,2]                      |
|                                   |         | 1200(s) | $\nu$ (C(CH <sub>3</sub> ) <sub>2</sub> );<br>$\nu$ (C-C)                                                                          | cyclic C-C bonds in the pectin<br>ring [1,2,4,5,11,12,16]; flavonoids<br>[3,16-19]                                                             |
|                                   |         | 1176    | $\rho_{as}$ (CH); $\nu$ (C-O);<br>$\nu$ (C-C); $\delta$ (HCC)                                                                      | cyclic C-C bonds in the pectin<br>ring [1,2,4,5,11,12,16]; flavonoids<br>[3,16-19]                                                             |
| 1142                              | 1142    | 1140    | $\nu$ (C-O-C); $\nu$ (C-C);<br>$\nu_{as}$ (O-C-O)                                                                                  | Glycosidic bond in<br>polysaccharide ring<br>[1,2,11,12,20]; cyclic C-C bonds in<br>the pectin ring [7,12]                                     |
| 1094                              | 1096    | 1096    | $\nu$ (C-O); $\nu$ (C-OH);<br>$\nu$ (C-O-C); $\nu$ (C-C)                                                                           | Pyranose and glycoside<br>[1,2,15,20]; pectin ring<br>[2,11,12,19]; uronic acid [3,7]                                                          |
| 1072                              | 1070    | 1067(s) | $\nu$ (C-O); $\rho$ (CO);<br>$\nu$ (C-O-C); $\nu$ (C-C)                                                                            | Pyranose and glycoside<br>[1,2,12,19]; arabinose and<br>galactose [7]                                                                          |
| 1047                              | 1046    | 1045    | $\nu$ (C-O); $\rho$ (CO);<br>$\nu$ (C-O-C);<br>$\nu$ (C-OH);<br>$\nu$ (C-C); $\rho$ (CH <sub>3</sub> )                             | Pyranose and glycoside<br>[1,2,11,12,19]; arabinose and<br>galactose [7]; flavonoids<br>[3,9,15,19]                                            |
| 1013                              | 1010    | 1012    | $\nu$ (C-C); $\nu$ (C-O)                                                                                                           | Polysaccharides [2,3,7,20]; pectin<br>(C2-C3, C2-O2, C1-O1) [12,19];<br>uronic acid [7]                                                        |
|                                   | 966     | 970     | $\gamma$ (=CH); $\rho$ (CH <sub>3</sub> );<br>$\nu$ (C=C) <sub>trans</sub> ;                                                       | Polysaccharides [1-3,7,20];<br>arabinose and galactose [7];<br>flavonoids [3,9,15-19]                                                          |
| 954(s)                            |         |         | $\delta$ (C=O); $\delta$ (CCH);<br>$\delta$ (COH)                                                                                  | Polysaccharides in pectin [1-<br>3,7,20]; carotenoids [8]                                                                                      |
| 914                               | 924     | 919     | $\rho$ (CH <sub>3</sub> ); $\alpha$ -<br>anomeric linkage;<br>$\delta_{op}$ (=CH) <sub>trans</sub> ;<br>$\beta$ (Ph); $\tau$ (HCC) | Ester methyl groups [1,12,20];<br>glucose and fructose [1,2,12];<br>phenyl moieties [3,9,15-18];<br>pectin [2,6,19]; flavonoids<br>[3,9,15-19] |
|                                   | 909     |         | $\nu$ (C-C); $\delta_{op}$ (CH);<br>$\delta$ (CCH); $\delta$ (COH)                                                                 | Aromatic compounds [3,9,15-<br>19]; pectins [1,2,3,6,19]                                                                                       |

| $\tilde{\nu}$ (cm <sup>-1</sup> ) |     |        | Vibrational mode                                                                                              | Identification                                                                                                  |
|-----------------------------------|-----|--------|---------------------------------------------------------------------------------------------------------------|-----------------------------------------------------------------------------------------------------------------|
| 883                               | 883 | 886    | $\beta$ (CH); $\delta$ (CCH); $\delta$ (COH); $\gamma$ (=CH); $\delta_{op}$ (C=CH <sub>2</sub> )              | Methylene groups[1,12,20]; vinylidene groups of terpenoids [21]                                                 |
|                                   |     | 864(s) | $\rho$ (CH <sub>2</sub> ); $\delta_{ip}$ (CH); $\rho$ (CH <sub>2</sub> ); $\beta$ (C-C <sub>ring</sub> )      | Pyranose [1,2,11,12,19]; phenols [3,9,15–19]                                                                    |
| 845                               |     |        | $\rho$ (CH <sub>2</sub> )                                                                                     | Pectin                                                                                                          |
| 829                               | 832 | 831    | $\gamma$ (OH); $\delta_{op}$ (CH)                                                                             | Six-membered ring of polyphenols [3,9,15,19]; $\alpha$ -glycosidic linkages [7]; phenolic compounds [3,9,15,19] |
| 805                               | 805 | 812    | $\rho$ (CH <sub>2</sub> ); $\delta_{ip}$ (C-H); $\beta_{op}$ (CH)                                             | Pyranose [1,2,11,12,19]                                                                                         |
| 780(s)                            | 783 | 779(s) | $\omega$ (CH); $\rho$ (CH <sub>2</sub> ); $\delta_{ip}$ (C-H); $\gamma$ (COH); $\delta_{op}$ (=CH) <i>cis</i> | Pyranose [1,2,11,12,19]; six-membered ring of polyphenols [3,9,15,19]                                           |
| 758                               | 761 | 759    | $\delta_{op}$ (=CH) <i>cis</i> ; breath                                                                       | Breathing ring [1,12]                                                                                           |
| 743                               |     |        | $\beta_{op}$ CH <sub>cis</sub> ; $\rho_{ip}$ CH <sub>2</sub>                                                  |                                                                                                                 |
|                                   | 709 | 712    | $\rho$ (CH <sub>2</sub> ); $\gamma$ (COH); $\delta_{op}$ (=CH); $\delta_{op}$ (=CH) <i>cis</i>                | six-membered ring of polyphenols [3,9,15,19]; vibrations of pyranoid ring [1,2,11,12,19]                        |
|                                   |     | 703    | $\delta_{op}$ (=CH)                                                                                           | Pectin [1,2,3,6,19]                                                                                             |
|                                   | 684 | 686(s) | $\omega$ (C=O); $\delta_{op}$ (=CH); $\nu_s$ (C-O-C)                                                          | Glycoside linkage [1,2]; acidic pectins [1,2,3,6,19]                                                            |
|                                   | 659 | 660    | $\beta$ (C-C-O); $\gamma$ (C-O)                                                                               | Phenols [3,9,15,19]                                                                                             |

$\tilde{\nu}$  (cm<sup>-1</sup>) = wavenumber;  $\nu$  = stretching,  $\delta$  = bending/scissoring,  $\rho$  = rocking,  $\beta$  = deformation modes,  $\omega$  = wagging, breath = breathing,  $\gamma$  = out of plane ring vibrations,  $\tau$  = twisting; as and s = asymmetric and symmetric; ip and op = in plane and out of plane, respectively.

**Table S2.** Results of the spectral deconvolution by non-linear least-squares fitting of the 1800-1470 cm<sup>-1</sup> region.

| Lemon IntegroPectin               |      |       | Grapefruit IntegroPectin          |      |       | Vibrational mode                                                                           | Reference       |
|-----------------------------------|------|-------|-----------------------------------|------|-------|--------------------------------------------------------------------------------------------|-----------------|
| $\tilde{\nu}$ (cm <sup>-1</sup> ) | w    | A     | $\tilde{\nu}$ (cm <sup>-1</sup> ) | w    | A     |                                                                                            |                 |
| 1750                              | 20.6 | 1.29  | 1750                              | 21.2 | 1.35  | $\nu$ (C=O) <sub>ester</sub>                                                               | [1,2,4–7]       |
| 1723                              | 39.5 | 7.65  | 1722                              | 40.3 | 8.87  | $\nu_s$ (C=O) <sub>carboxylate and nonconj. keto groups</sub>                              | [1–3,8–9,11,12] |
| 1689                              | 71.5 | 14.53 | 1678                              | 58.3 | 8.01  | $\nu$ (C=O) <sub>acid</sub>                                                                | [1,8,10]        |
|                                   |      |       | 1637                              | 23.5 | 2.69  | $\delta$ (H <sub>2</sub> O); $\nu$ (C=C) <sub>uracyl</sub> ; $\nu$ (C-C) <sub>phenyl</sub> | [1,3–9]         |
|                                   |      |       | 1613                              | 22.7 | 1.55  | $\nu_{as}$ (COO) <sub>carboxylate</sub>                                                    | [1,7,11,12]     |
| 1594                              | 67.5 | 22.82 | 1591                              | 55.9 | 17.90 | $\nu$ (C=O) <sub>aromatic skeleton and keto groups</sub>                                   | [3,9,13–15]     |
| 1511                              | 19.5 | 0.666 | 1516                              | 15.7 | 0.77  | $\delta_{ip}$ (CH); $\nu$ (C=C)                                                            | [3,8,9,15]      |

$\tilde{\nu}$  (cm<sup>-1</sup>) = wavenumber; w = width; A = integrated area.

**Table S3.** Results of the spectral deconvolution by non-linear least-squares fitting of the 1200-950  $\text{cm}^{-1}$  region.

| Commercial pectin                  |       | citrus |                                    | Lemon IntegroPectin |       | Grapefruit IntegroPectin           |       |       | Vibrational mode                                                                                                | Reference                      |
|------------------------------------|-------|--------|------------------------------------|---------------------|-------|------------------------------------|-------|-------|-----------------------------------------------------------------------------------------------------------------|--------------------------------|
| $\tilde{\nu}$ ( $\text{cm}^{-1}$ ) | w     | A      | $\tilde{\nu}$ ( $\text{cm}^{-1}$ ) | w                   | A     | $\tilde{\nu}$ ( $\text{cm}^{-1}$ ) | w     | A     |                                                                                                                 |                                |
|                                    |       |        |                                    |                     |       | 1181                               | 18.17 | 0.78  | $\rho_{\text{as}}$ (CH);<br>v (C-O);<br>v (C-C) <sub>pectin</sub><br>ring;<br>$\delta$ (HCC) <sub>flavon.</sub> | [1–<br>5,11,12,16<br>–19]      |
| 1145                               | 30.85 | 4.30   | 1141                               | 25.90               | 2.58  | 1139                               | 23.81 | 2.68  | v (C-O-<br>C) <sub>glycosidic</sub><br>bond; v (C-C)<br>pectin ring                                             | [1,2,7,11,1<br>2,20]           |
| 1097                               | 30.75 | 8.75   | 1099                               | 27.32               | 8.22  | 1098                               | 30.93 | 9.46  | v (C-O);<br>v(C-O-C);<br>v (C-OH);<br>v (C-C)                                                                   | [1–<br>3,7,11,12,1<br>5,19,20] |
| 1069                               | 20.00 | 4.90   | 1070                               | 21.30               | 6.42  | 1067                               | 26.12 | 9.64  | v (C-O);<br>$\rho$ (CO);<br>v (C-O-C);<br>v (C-OH);<br>v (C-C)                                                  | [1,2,<br>7,12,19];             |
| 1049                               | 17.11 | 3.20   | 1047                               | 18.47               | 5.20  | 1045                               | 20.37 | 6.53  | v (C-O);<br>$\rho$ (CO);<br>v (C-O-C);<br>v (C-OH);<br>v (C-C);<br>$\rho$ (CH <sub>3</sub> ) <sub>flavon.</sub> | [1–3,<br>7,9,11,12,1<br>9]     |
| 1016                               | 34.70 | 14.10  | 1012                               | 36.87               | 17.60 | 1015                               | 36.18 | 20.90 | v (C-C);<br>v (C-O)                                                                                             | [2,3,7,12,<br>19,20]           |
| 966                                | 45.52 | 8.50   | 967                                | 28.70               | 5.30  | 970                                | 34.61 | 8.92  | $\gamma$ (=CH);<br>C=C <i>trans</i> ;<br>$\rho$ (CH <sub>3</sub> ) <sub>flavon.</sub>                           | [1–3,7,9,<br>15–20]            |

$\tilde{\nu}$  ( $\text{cm}^{-1}$ ) = wavenumber; w = width; A = integrated area.

## References

- Fidalgo, A.; Ciriminna, R.; Carnaroglio, D.; Tamburino, A.; Cravotto, G.; Grillo, G.; Ilharco, L.M.; Pagliaro, M. Eco-friendly extraction of pectin and essential oils from orange and lemon peels. *ACS Sustainable Chem. Eng.* **2016**, *4*, 2243–2251.
- Synytsya, A.; Copikova, J.; Matejka, P.; Machovic, V. Fourier transform Raman and infrared spectroscopy of pectins. *Carbohydr. Polym.* **2003**, *54*, 97–106.
- Heredia-Guerrero, J.A.; Benitez, J.J.; Dominguez, E.; Baye, I.S.; Cingolani, R.; Athanassiou, A.; Heredia, A. Infrared and Raman spectroscopic features of plant cuticles: a review. *Front. Plant. Sci.* **2014**, *5*, 305.
- Manrique, G.D.; Lajolo, F.M. FT-IR spectroscopy as a tool for measuring degree of esterification in pectins isolated from ripening papaya fruit. *Postharvest Biol. Tec.* **2002**, *25*, 99–107.
- Kyomugasho, C.; Christiaens, S.; Shpigelman, A.; Van Loey, A.M.; Hendrickx, M.E. FT-IR spectroscopy, a reliable method for routine analyses of the degree of methyl esterification of pectin in different fruit- and vegetable-based matrices. *Food Chem.* **2015**, *176*, 82–90.
- Wang, W.; Ma, X.; Jiang, P.; Hu, L.; Zhi, Z.; Chen, J.; Ding, T.; Ye, X.; Liu, D. Characterization of pectin from grapefruit peel: a comparison of ultrasound-assisted and conventional heating extractions. *Food Hydrocoll.* **2016**, *61*, 730–739.

7. La Cava, E.L.; Gerbino, E.; Sgroppo, S.C.; Gomez-Zavaglia, A. Characterization of pectins extracted from different varieties of pink/red and white grapefruits [*Citrus paradisi* (Macf.)] by thermal treatment and thermosonication. *Food Chem.* **2018**, *83*, 1613–1621.
8. Lorand, T.; Deli, J.; Molnar, P.; Toth, G. FT-IR study of some carotenoids. *Helv. Chim. Acta*, **2002**, *85*, 1691–1697.
9. Ricci, A.; Olejar, K.J.; Parpinello, G.P.; Kilmartin, P.A.; Versari, A. Application of Fourier transform infrared (FT-IR) spectroscopy in the characterization of tannins. *Appl. Spectrosc. Rev.* **2015**, *50*, 407–442.
10. Espana, L.; Heredia-Guerrero, J.A.; Segado, P.; Benitez, J.J.; Heredia, A.; Dominguez, E. Biochemical properties of the tomato (*Solanum lycopersicum*) fruit cuticle during development are modulated by changes in the relative amounts of its components. *New Phytol.* **2014**, *202*, 790–802.
11. Aburto, J.; Moran, M.; Galano, A.; Torres-Garcia, E. Non-isothermal pyrolysis of pectin: a thermochemical and kinetic approach. *J. Anal. Appl. Pyrol.* **2015**, *112*, 94–104.
12. Bichara, L.C.; Alvarez, P.E.; Fiori Bimbi, M.V.; Vaca, H.; Gervasi, C.; Brandan, S.A. Structural and spectroscopic study of a pectin isolated from citrus peel by using FTIR and FT-Raman spectra and DFT calculations. *Infrared Phys. Techn.* **2016**, *76*, 315–327.
13. Zeier, J.; Schreiber, L. Fourier transform infrared-spectroscopic characterization of isolated endodermal cell walls from plant roots: chemical nature in relation to anatomical development. *Planta.* **1999**, *209*, 537–542.
14. Rashid, T.; Kait, C.F.; Murugesan, T. A “Fourier transformed infrared” compound study of lignin recovered from a formic acid process. *Procedia Eng.* **2016**, *148*, 1312–1319.
15. Zeier, J.; Schreiber, L. Fourier transform infrared-spectroscopic characterization of isolated endodermal cell walls from plant roots: chemical nature in relation to anatomical development. *Planta.* **1999**, *209*, 537–542.
16. Sene, C.F.; McCann, M.C.; Wilson, R.H.; Grinter, R. Fourier-transform Raman and Fourier-transform infrared spectroscopy: an investigation of five higher plant cell walls and their components. *Plant Phys.* **1994**, *106*, 1623–1631.
17. Suresh, R.; Balakumar, R.; Krishnakumar, N.; Saleem, H.; Subashchandrabose, S. Structural geometry, vibrational and electronic spectra investigation on narginin molecules using experimental and density functional theory calculation. *Int. J. Mol. Theor. Phy.* **2018**, *2*, 1–22.
18. Tracanna, M.I.; Romano, E.; Raschi, A.B.; Fortuna, A.M.; Brandan, S.A. Structural and FT-IR studies of phenolic 2,8-dihydroxy-7H-furo [2,3-f]chromen-7-one derivative isolated from *Tibouchina paratropica*. *J. Mater. Environ. Sci.* **2019**, *10*, 818–831.
19. Schulz, H.; Baranska, M. Fruits and vegetables. In *Infrared Spectroscopy for Food Quality Analysis and Control*, Sun, D.W., Ed. Academic Press, London, UK, 2009; pp. 321–353.
20. Copikova, J.; Synytsya, A.; Cerna, M.; Kaasova, J.; Novotna, M. Application of FT-IR spectroscopy in detection of food hydrocolloids in confectionery jellies and food supplements. *Czech. J. Food Sci.* **2001**, *19*, 51–56.
21. Mitzner, B.M.; Theimer, E.T.  $\beta$ -Terpinene and  $\beta$ -Pellandrene from the pyrolysis of Sabinene. *J. Org. Chem.* **1962**, *27*, 3359.
